# Supplementary material for: Synthesis and properties of colorless copolyimides derived from 4,4′-diaminodiphenyl ether-based diamines with different substituents
Source: Royal Society of Chemistry journal article supplement (doi:10.1039/d1py00633a), 2021-01-01
Supplement: d1py00633a1.pdf [file d1py00633a1.pdf]

## Supplementary Information

### **Synthesis and Properties of Colorless Copolyimides Derived from 4,4'-Diaminodiphenyl Ether-Based Diamines with Different Substituents**

Ruhe Lian<sup>#a,b</sup>, Xingfeng Lei<sup>#a,b\*</sup>, Yuyang Xiao<sup>a</sup>, Shuyu Xue<sup>a,b</sup>, Guo Xiong<sup>a</sup>, Zixiang Zhang<sup>a</sup>, Dong Yan<sup>a</sup>, Qiuyu Zhang<sup>a,b\*</sup>

<sup>a</sup>School of Chemistry and Chemical Engineering, Key Laboratory of Special Functional and Smart Polymer Materials of Ministry of Industry and Information Technology, Northwestern Polytechnical University, Xi'an, Shaanxi, 710072, P. R. China.

<sup>b</sup>School of Chemistry and Chemical Engineering, Key Laboratory of Material Physics and Chemistry under Extraordinary Conditions of Ministry of Education, Northwestern Polytechnical University, Xi'an, Shaanxi, 710072, P. R. China.

\*Corresponding Authors, E-mail: leifeng@nwpu.edu.cn, qyzhang@nwpu.edu.cn;

Fax/Tel: +86-02988431653.

<sup>#</sup>R. Lian and X. Lei contributed equally to this work and should be considered as co-first authors.

## List of Contents for Supplementary Materials

|                                                                                                                       |    |
|-----------------------------------------------------------------------------------------------------------------------|----|
| <b>Scheme S1.</b> Synthesis of <b>PI-5</b> via a conventional two-step chemical imidization.....                      | 3  |
| <b>Scheme S2.</b> Proposed CTC formation within <b>PI-2</b> (a) and <b>PI-3</b> (b) films.....                        | 3  |
| <b>Figure S1.</b> <sup>1</sup> H-NMR spectrum of <b><i>o</i>-M-NODA</b> in CDCl <sub>3</sub> .....                    | 3  |
| <b>Figure S2.</b> <sup>1</sup> H-NMR spectrum of <b><i>m</i>-M-NODA</b> in DMSO- <i>d</i> <sub>6</sub> .....          | 4  |
| <b>Figure S3.</b> <sup>1</sup> H-NMR spectrum of <b><i>m</i>-3F-NODA</b> in DMSO- <i>d</i> <sub>6</sub> .....         | 4  |
| <b>Figure S4.</b> <sup>13</sup> C-NMR spectrum of <b><i>o</i>-M-NODA</b> in DMSO- <i>d</i> <sub>6</sub> .....         | 5  |
| <b>Figure S5.</b> <sup>13</sup> C-NMR spectrum of <b><i>m</i>-M-NODA</b> in DMSO- <i>d</i> <sub>6</sub> .....         | 5  |
| <b>Figure S6.</b> <sup>13</sup> C-NMR spectrum of <b><i>m</i>-3F-NODA</b> in DMSO- <i>d</i> <sub>6</sub> .....        | 6  |
| <b>Figure S7.</b> <sup>1</sup> H-NMR spectrum of <b><i>o</i>-M-ODA</b> in DMSO- <i>d</i> <sub>6</sub> .....           | 6  |
| <b>Figure S8.</b> <sup>1</sup> H-NMR spectrum of <b><i>m</i>-M-ODA</b> in DMSO- <i>d</i> <sub>6</sub> .....           | 7  |
| <b>Figure S9.</b> <sup>1</sup> H-NMR spectrum of <b><i>m</i>-3F-ODA</b> in DMSO- <i>d</i> <sub>6</sub> .....          | 7  |
| <b>Figure S10.</b> <sup>1</sup> H-NMR spectrum of <b>ODA</b> in DMSO- <i>d</i> <sub>6</sub> .....                     | 8  |
| <b>Figure S11.</b> <sup>13</sup> C-NMR spectrum of <b><i>o</i>-M-ODA</b> in DMSO- <i>d</i> <sub>6</sub> .....         | 8  |
| <b>Figure S12.</b> <sup>13</sup> C-NMR spectrum of <b><i>m</i>-M-ODA</b> in DMSO- <i>d</i> <sub>6</sub> .....         | 9  |
| <b>Figure S13.</b> <sup>13</sup> C-NMR spectrum of <b><i>m</i>-3F-ODA</b> in DMSO- <i>d</i> <sub>6</sub> .....        | 9  |
| <b>Figure S14.</b> <sup>19</sup> F-NMR spectra of (a) <b><i>m</i>-3F-NODA</b> and (b) <b><i>m</i>-3F-ODA</b> .....    | 10 |
| <b>Figure S15.</b> FT-IR spectra of <b><i>o</i>-M-NODA</b> , <b><i>m</i>-M-NODA</b> and <b><i>m</i>-3F-NODA</b> ..... | 11 |
| <b>Figure S16.</b> FT-IR spectra of <b><i>o</i>-M-ODA</b> , <b><i>m</i>-M-ODA</b> and <b><i>m</i>-3F-ODA</b> .....    | 11 |
| <b>Figure S17.</b> GPC traces recorded in DMF for the resulting PIs.....                                              | 12 |
| <b>Figure S18.</b> <sup>1</sup> H-NMR spectra of the resulting polyimides in DMSO- <i>d</i> <sub>6</sub> .....        | 12 |
| <b>Figure S19.</b> FT-IR spectra of the resulting polyimides.....                                                     | 13 |
| <b>Figure S20.</b> XRD patterns of the resulting polyimides.....                                                      | 13 |

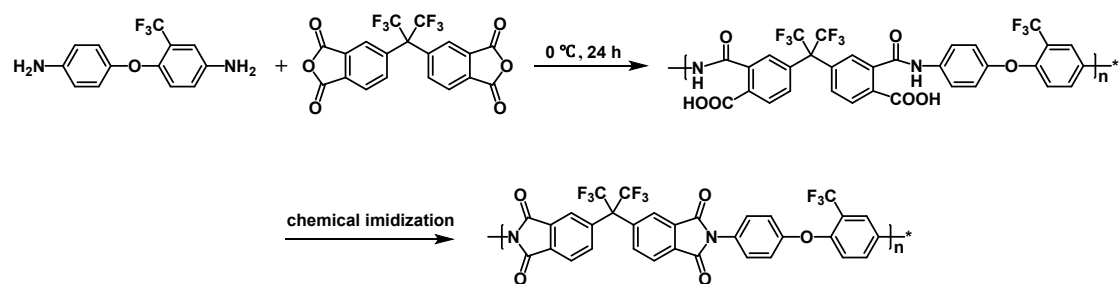

**Scheme S1.** Synthesis of PI-5 via a conventional two-step chemical imidization.

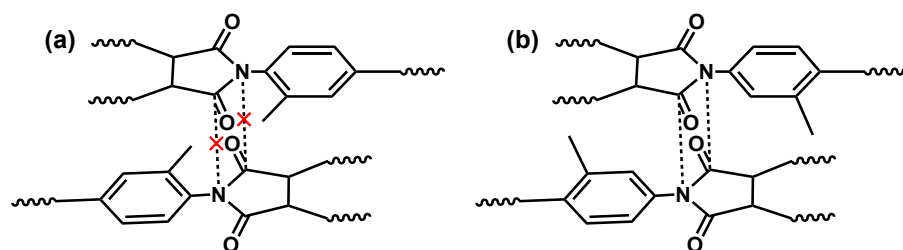

**Scheme S2.** Proposed CTC formation within PI-2 (a) and PI-3 (b) films.

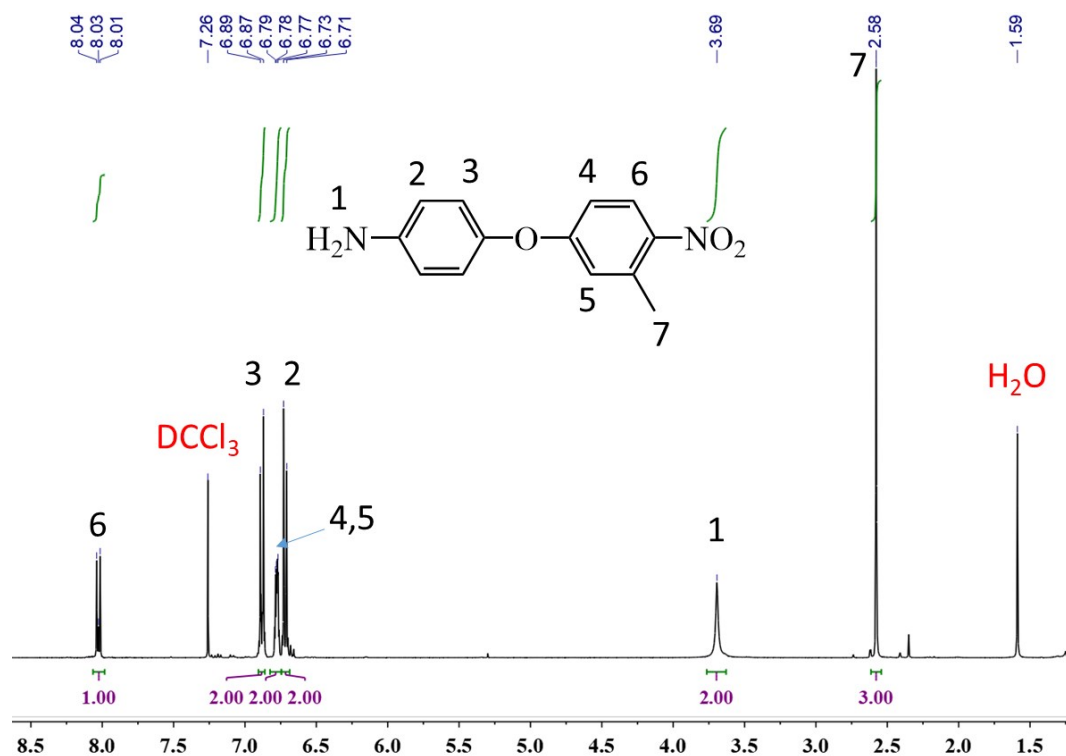

**Figure S1.** <sup>1</sup>H-NMR spectrum of *o*-M-NODA in CDCl<sub>3</sub>.

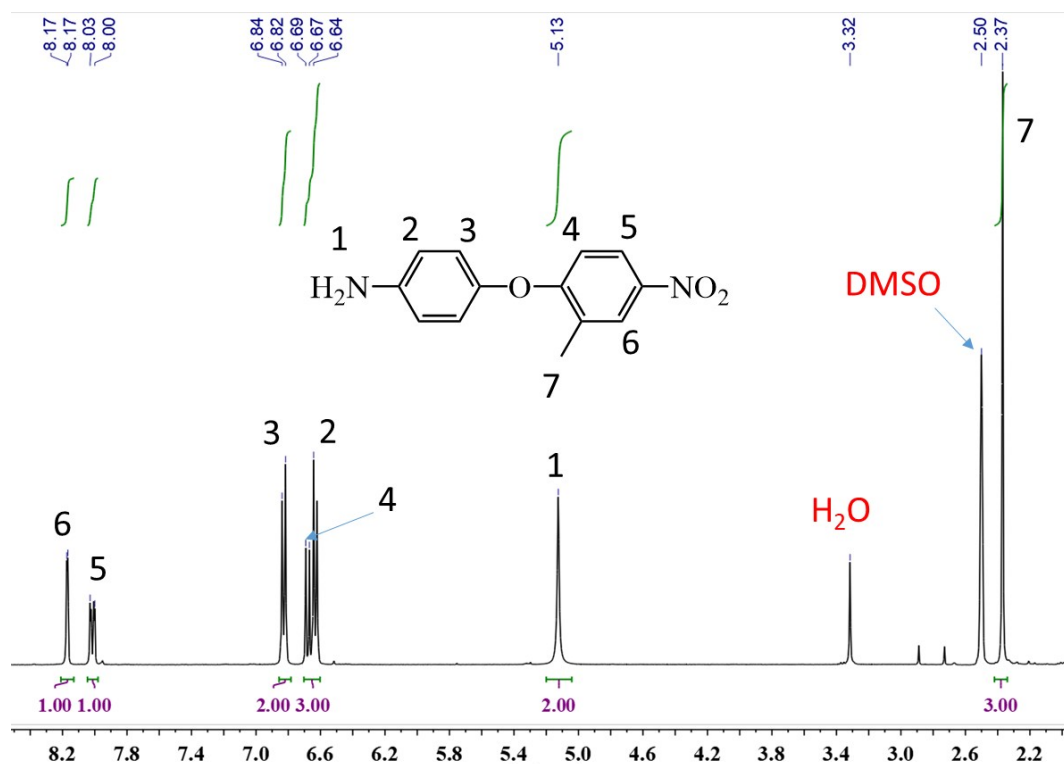

**Figure S2.** <sup>1</sup>H-NMR spectrum of *m*-M-NODA in DMSO-*d*<sub>6</sub>.

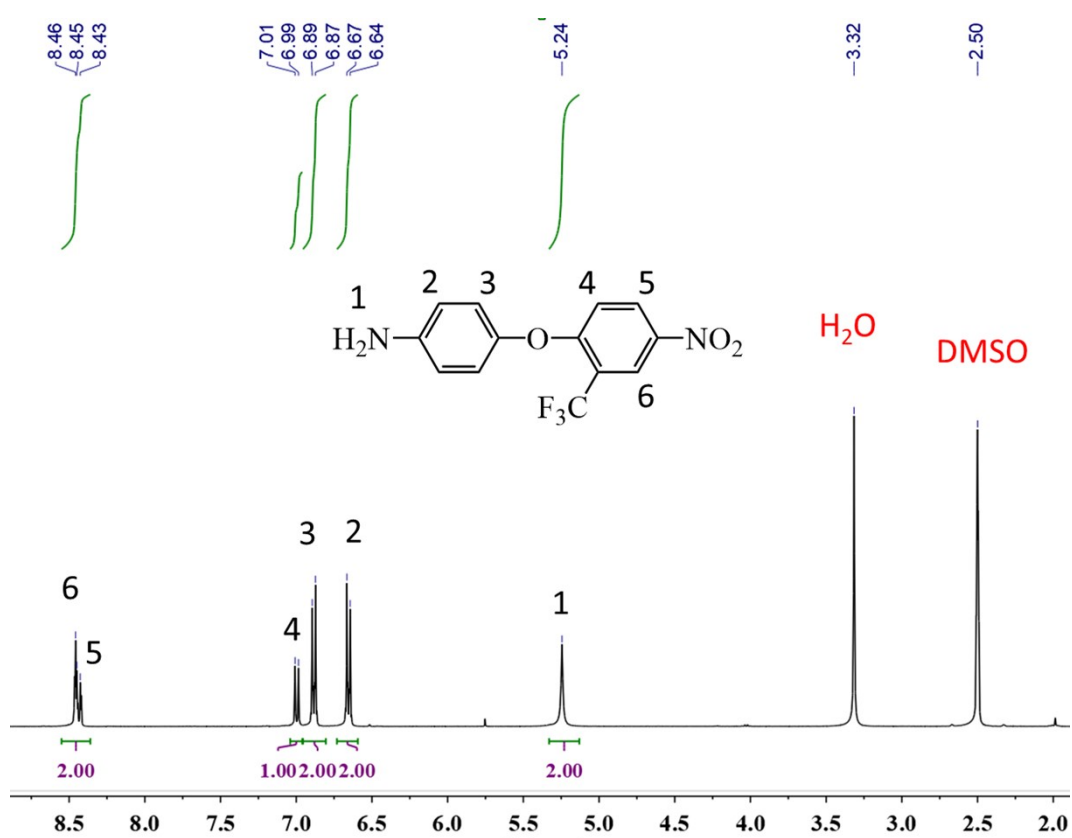

**Figure S3.** <sup>1</sup>H-NMR spectrum of *m*-3F-NODA in DMSO-*d*<sub>6</sub>.

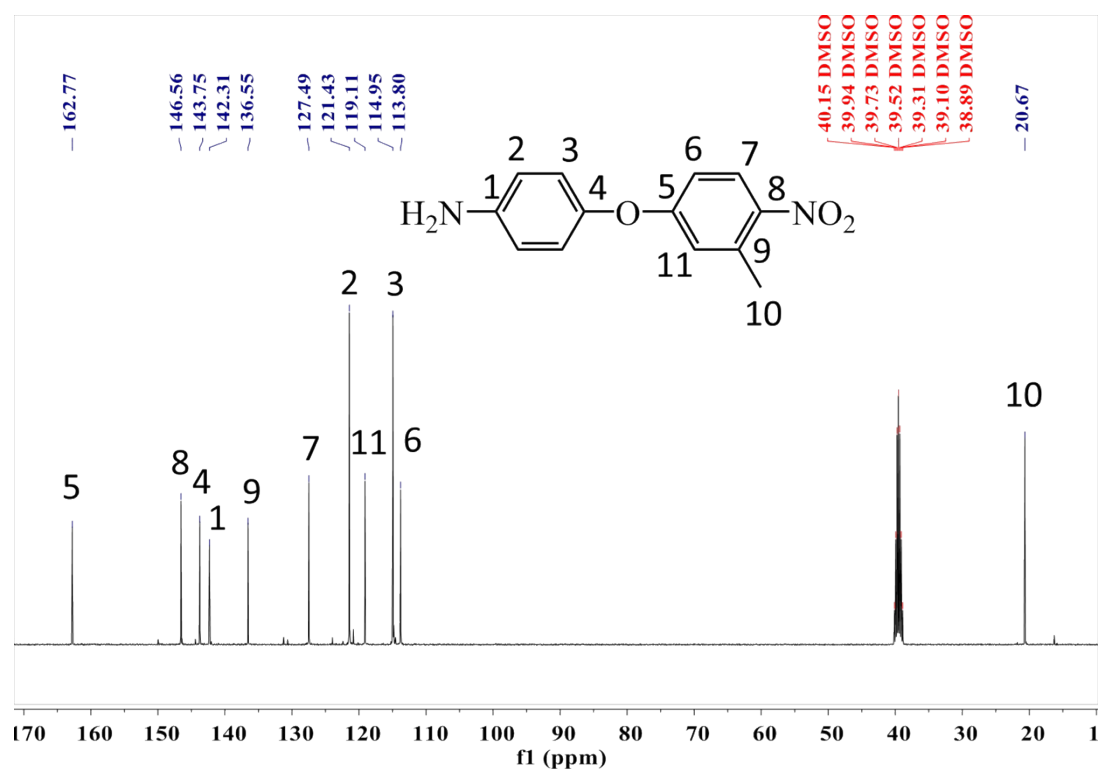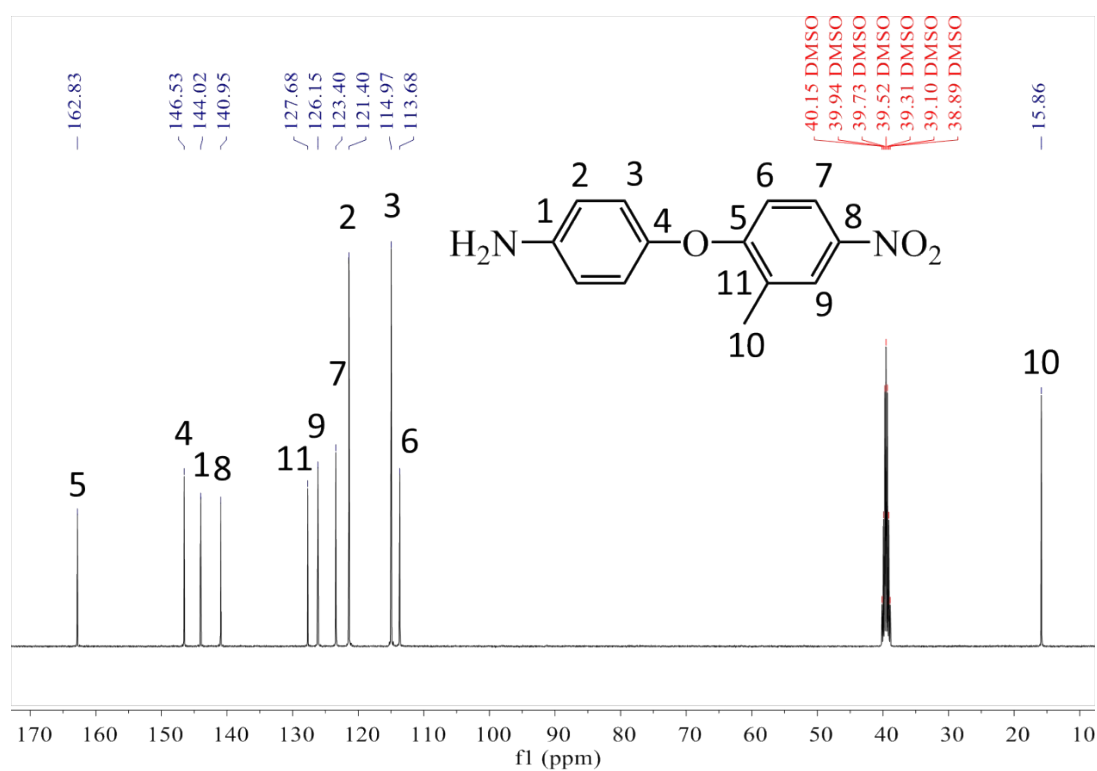

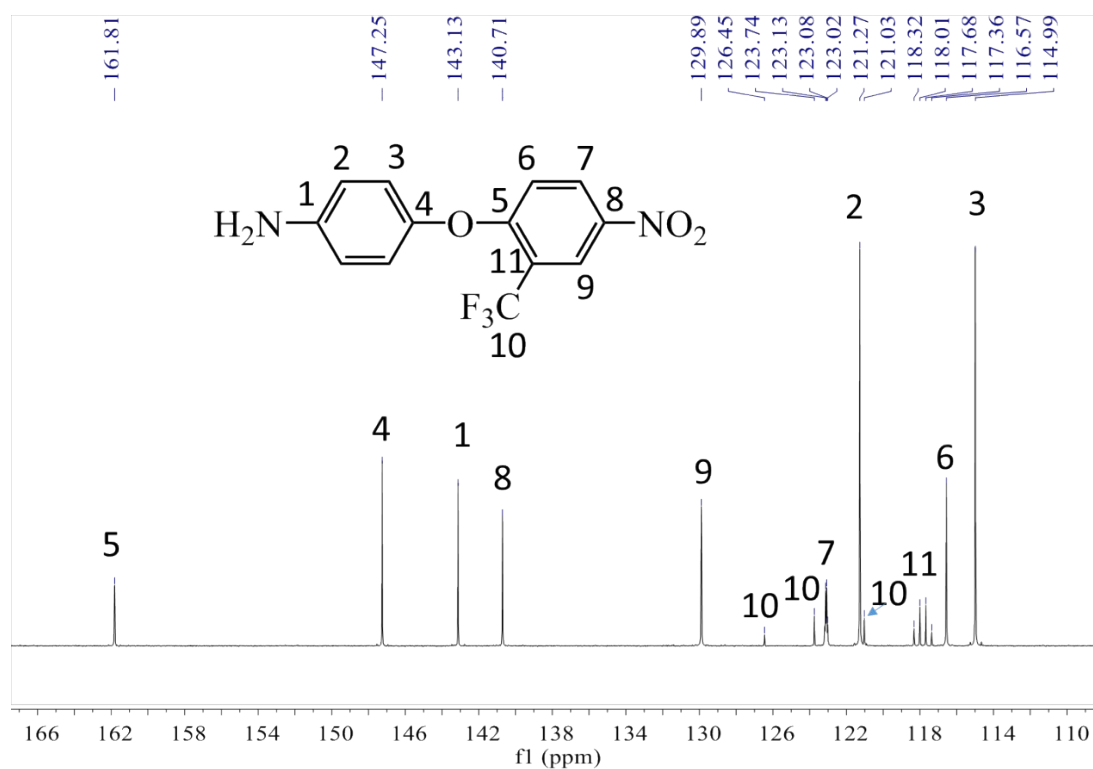

**Figure S6.**  $^{13}\text{C}$ -NMR spectrum of *m*-3F-NODA in  $\text{DMSO}-d_6$ .

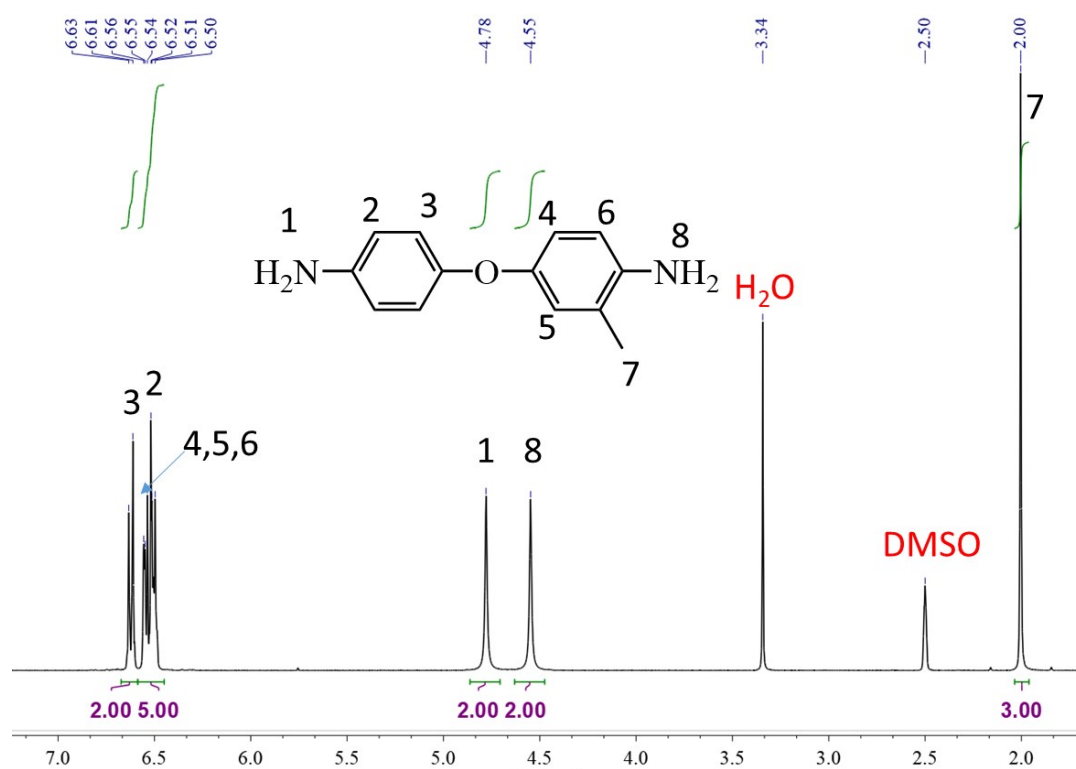

**Figure S7.**  $^1\text{H}$ -NMR spectrum of *o*-M-ODA in  $\text{DMSO}-d_6$ .

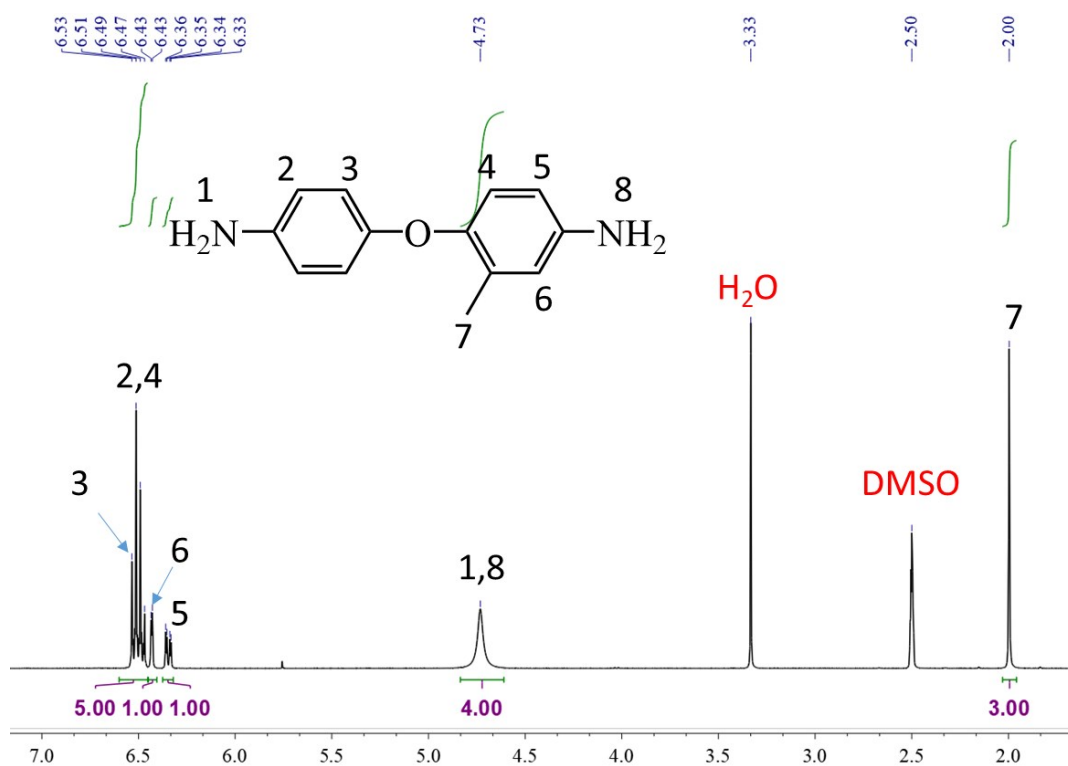

**Figure S8.**  $^1\text{H}$ -NMR spectrum of *m*-M-ODA in  $\text{DMSO-}d_6$ .

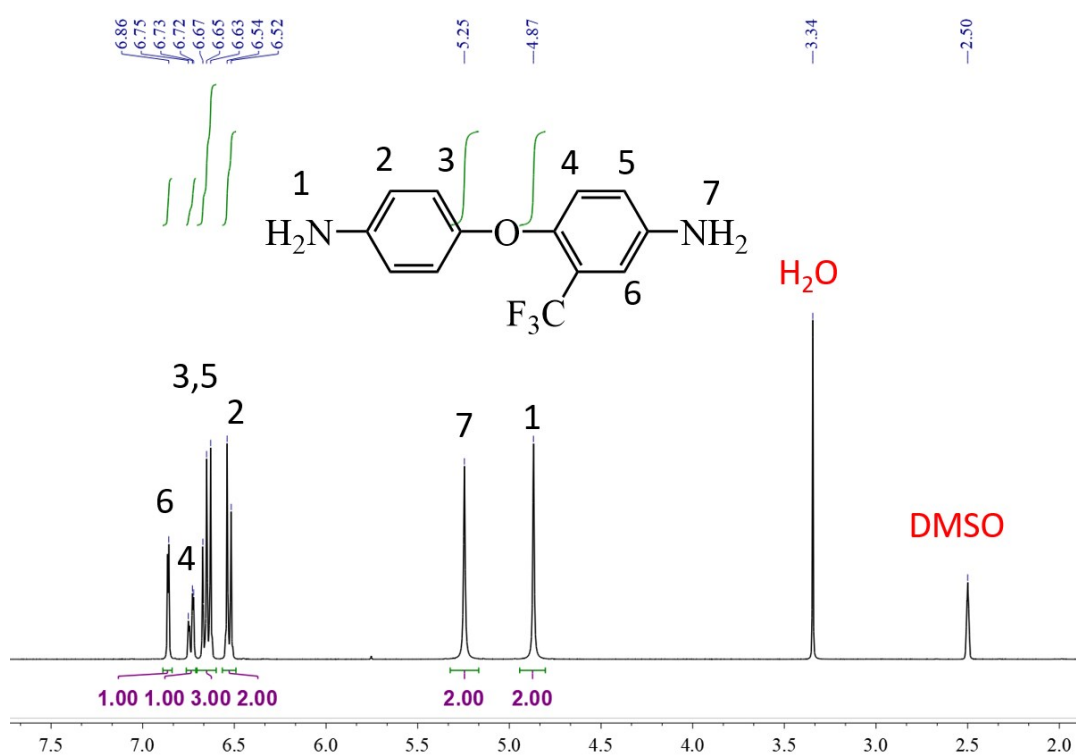

**Figure S9.**  $^1\text{H}$ -NMR spectrum of *m*-3F-ODA in  $\text{DMSO-}d_6$ .

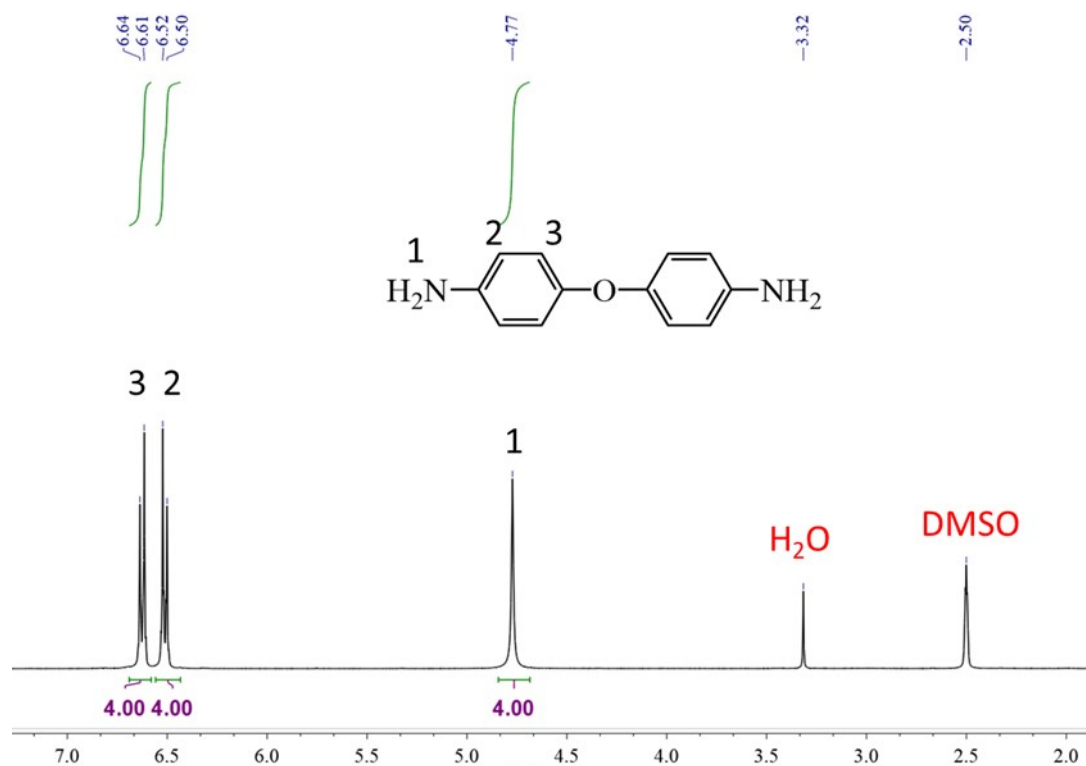

**Figure S10.**  $^1\text{H}$ -NMR spectrum of ODA in  $\text{DMSO}-d_6$ .

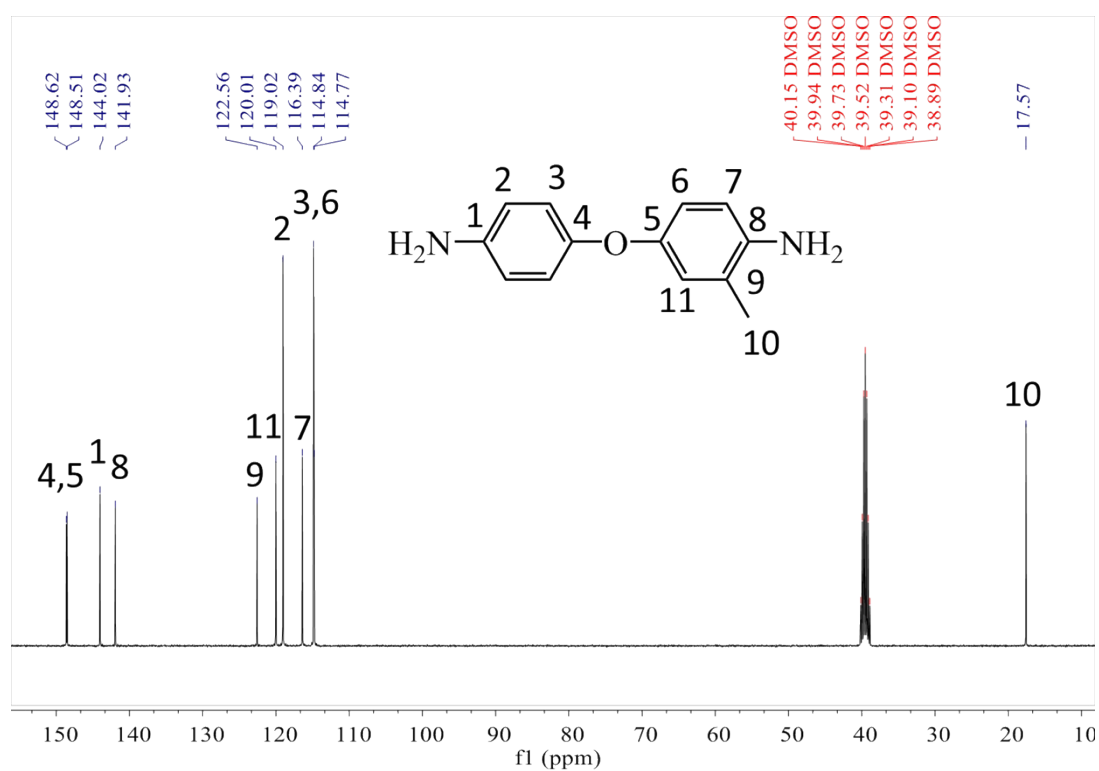

**Figure S11.**  $^{13}\text{C}$ -NMR spectrum of *o*-M-ODA in  $\text{DMSO}-d_6$ .

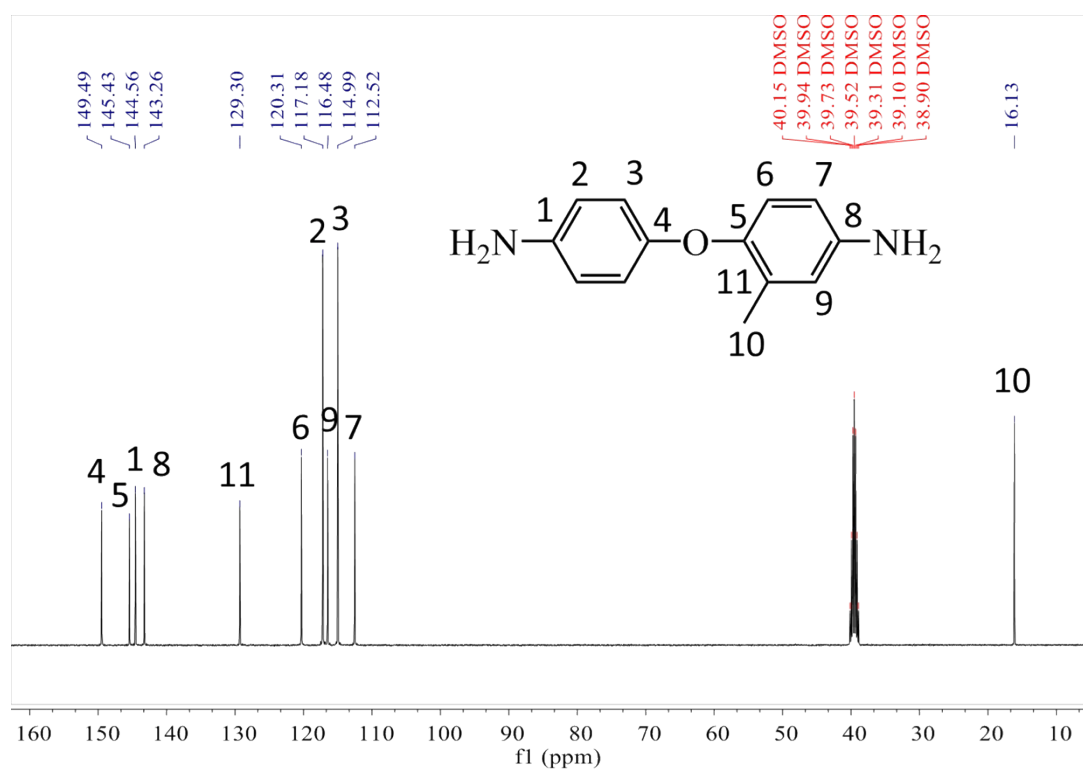

**Figure S12.** <sup>13</sup>C-NMR spectrum of *m*-M-ODA in DMSO-*d*<sub>6</sub>.

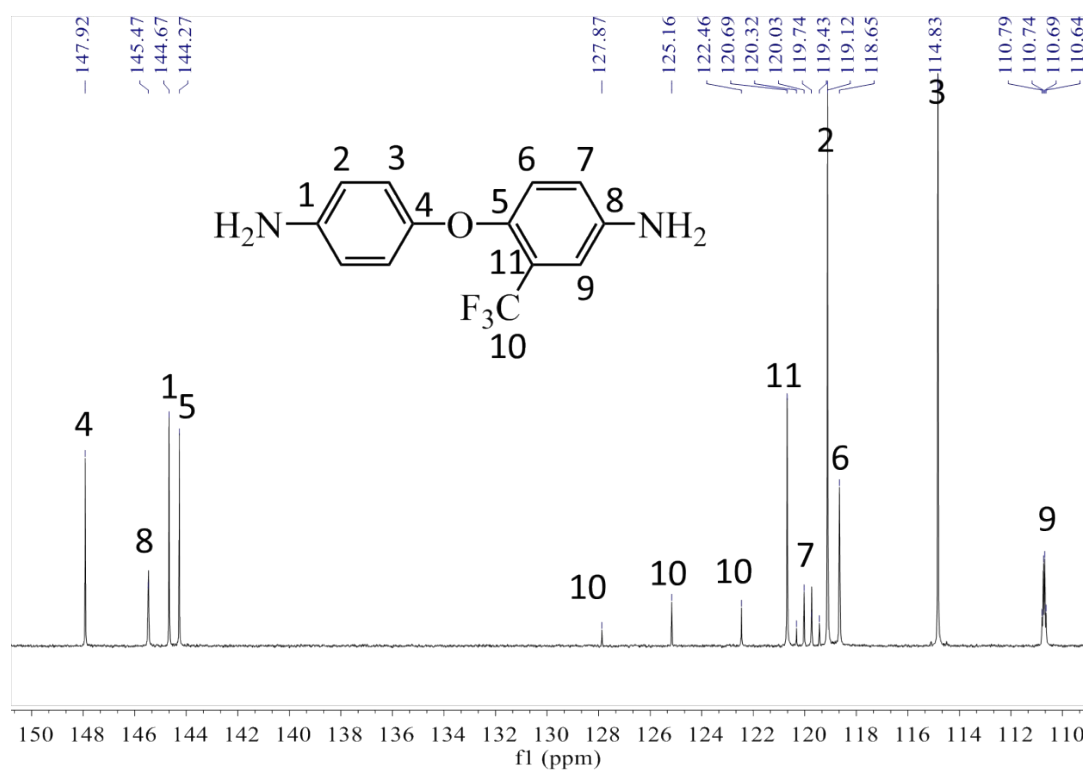

**Figure S13.** <sup>13</sup>C-NMR spectrum of *m*-3F-ODA in DMSO-*d*<sub>6</sub>.

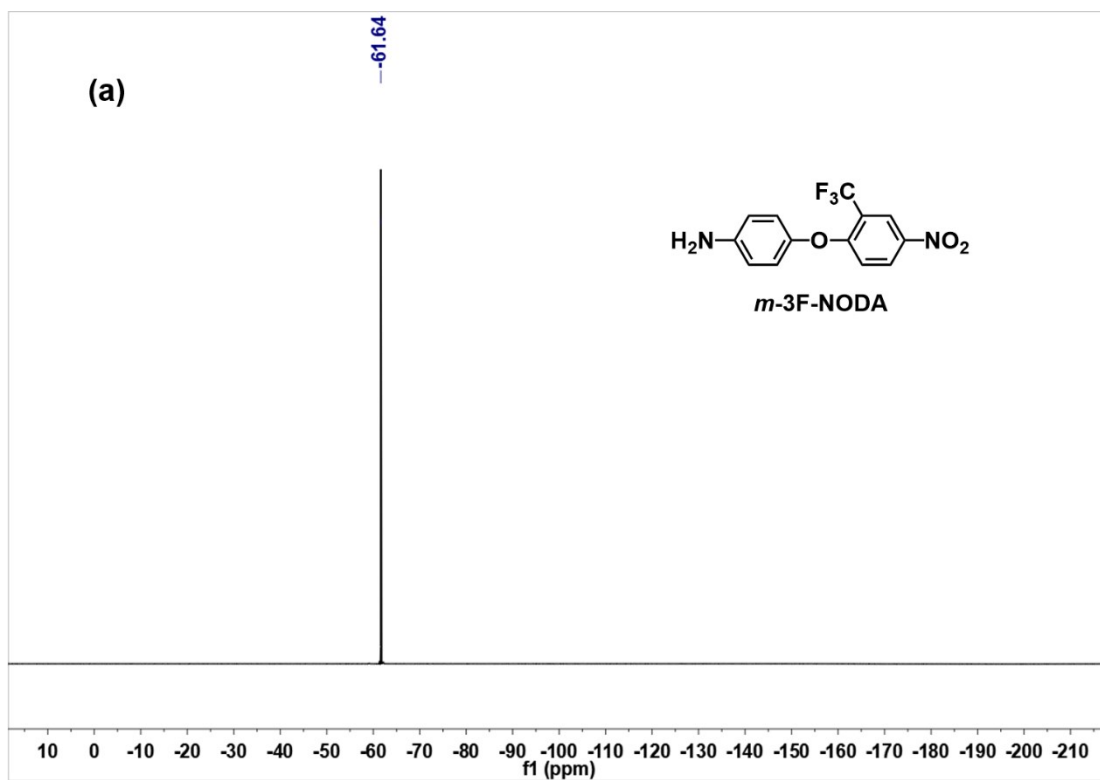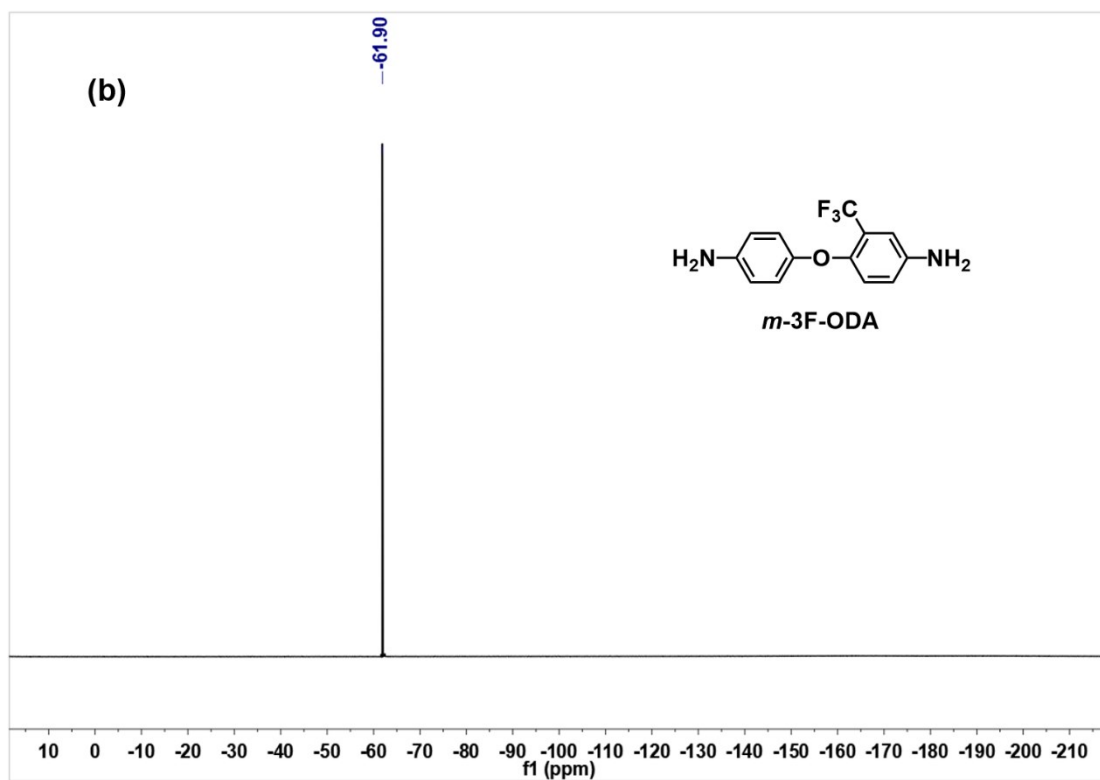

**Figure S14.**  $^{19}\text{F}$ -NMR spectra of (a) *m*-3F-NODA and (b) *m*-3F-ODA.

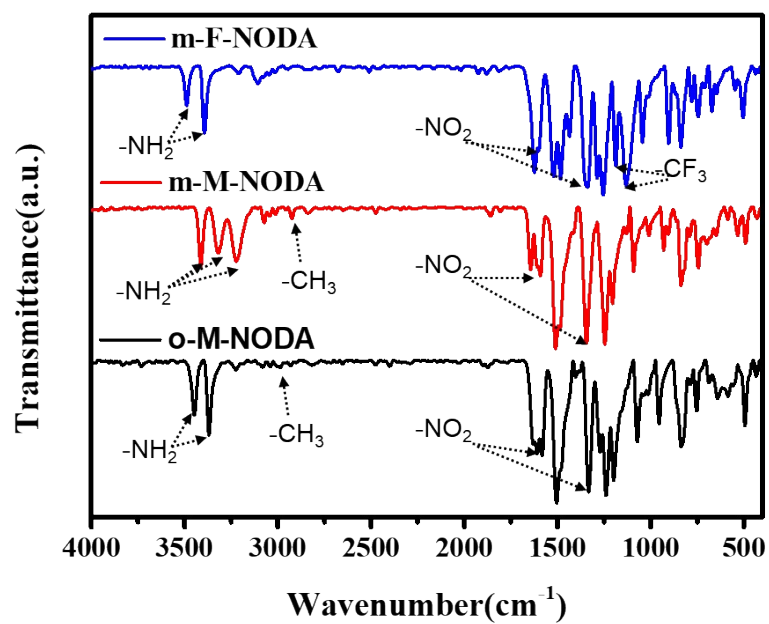

Figure S15. FT-IR spectra of *o*-M-NODA, *m*-M-NODA and *m*-3F-NODA.

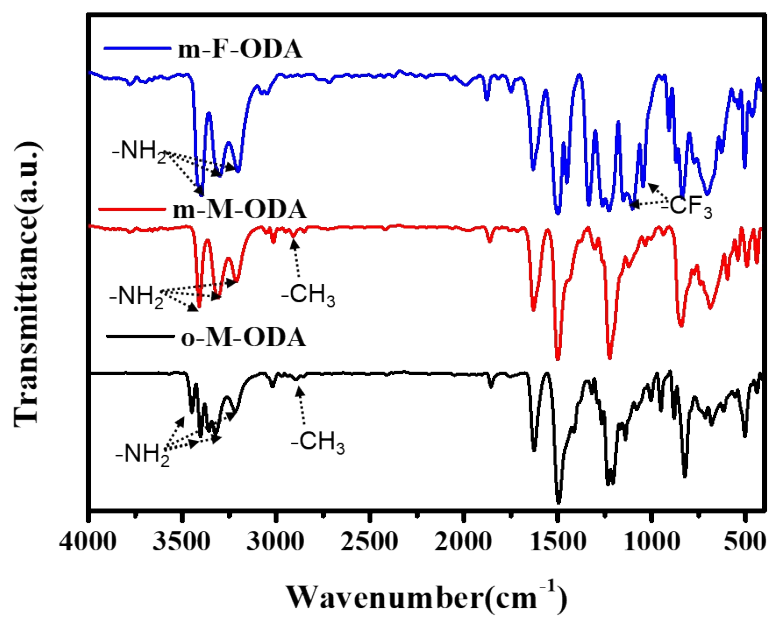

Figure S16. FT-IR spectra of *o*-M-ODA, *m*-M-ODA and *m*-3F-ODA.

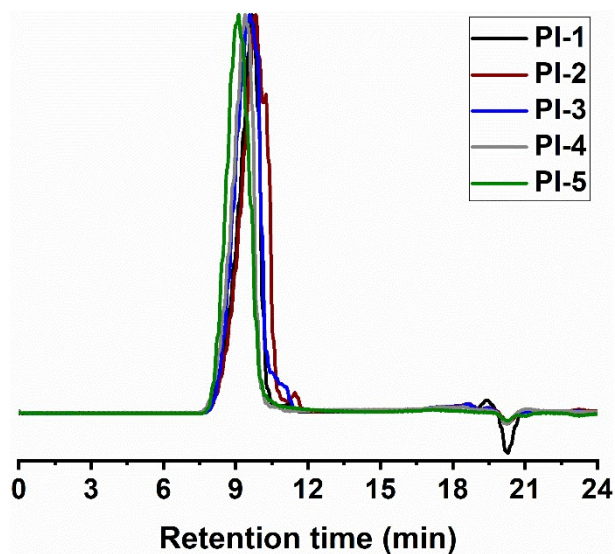

**Figure S17.** GPC traces recorded in DMF for the resulting PIs

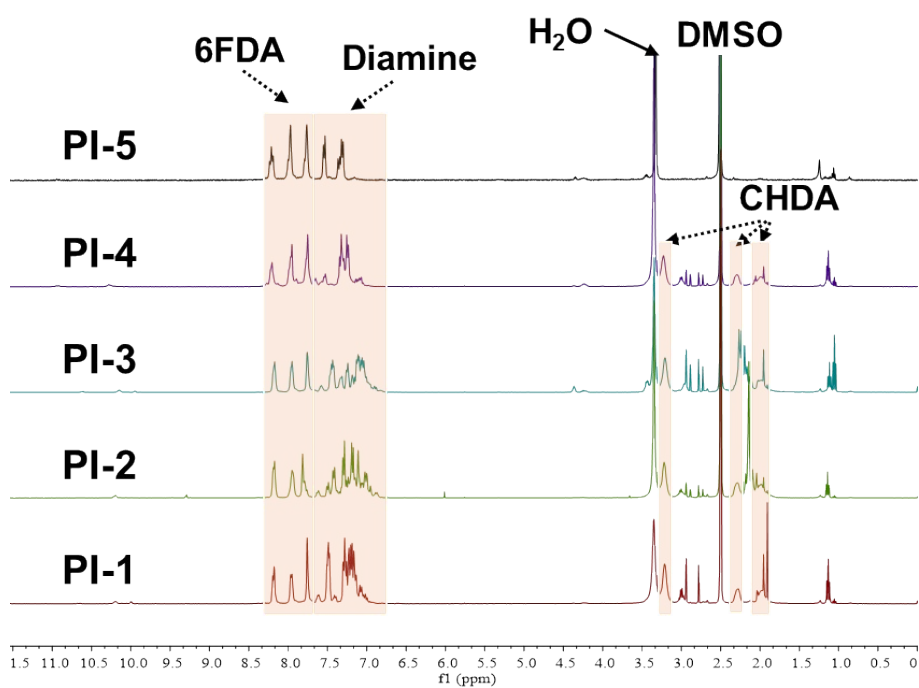

**Figure S18.**  $^1\text{H}$ -NMR spectra of the resulting polyimides in  $\text{DMSO}-d_6$ .

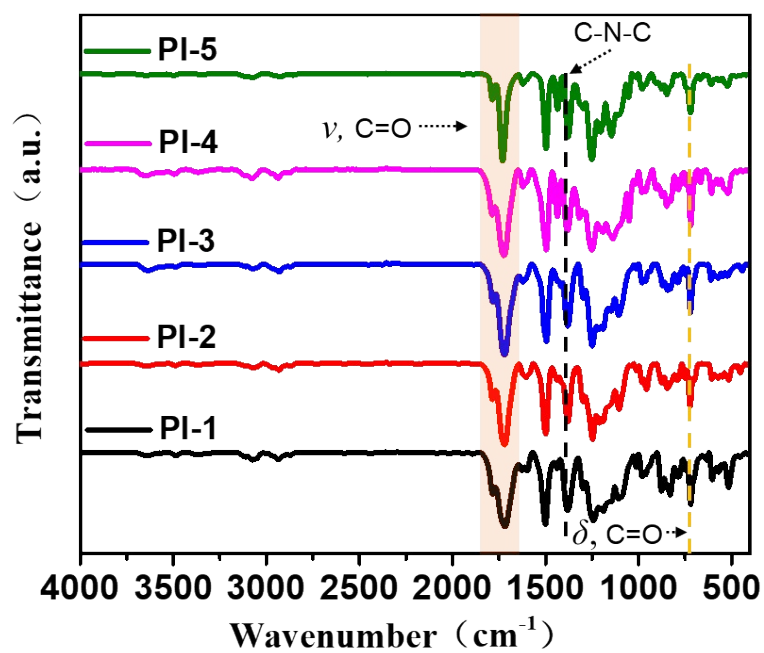

**Figure S19.** FT-IR spectra of the resulting polyimides.

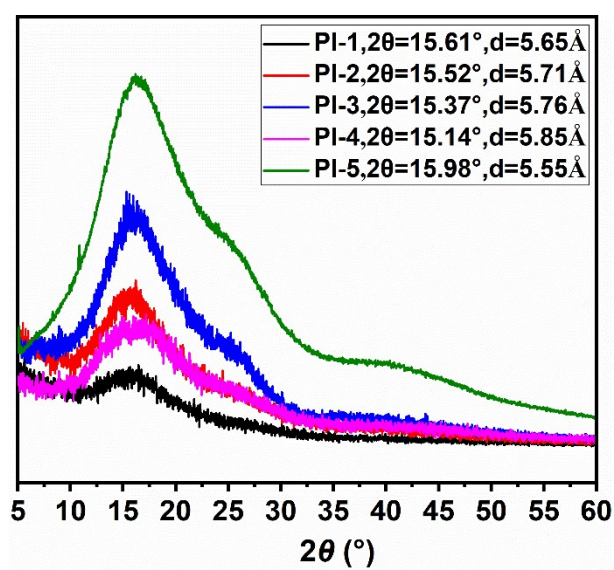

**Figure S20.** XRD patterns of the resulting polyimides.
